# Supplementary material
Source: PubMed Central journal article supplement (PMC5240150)

Figure S1

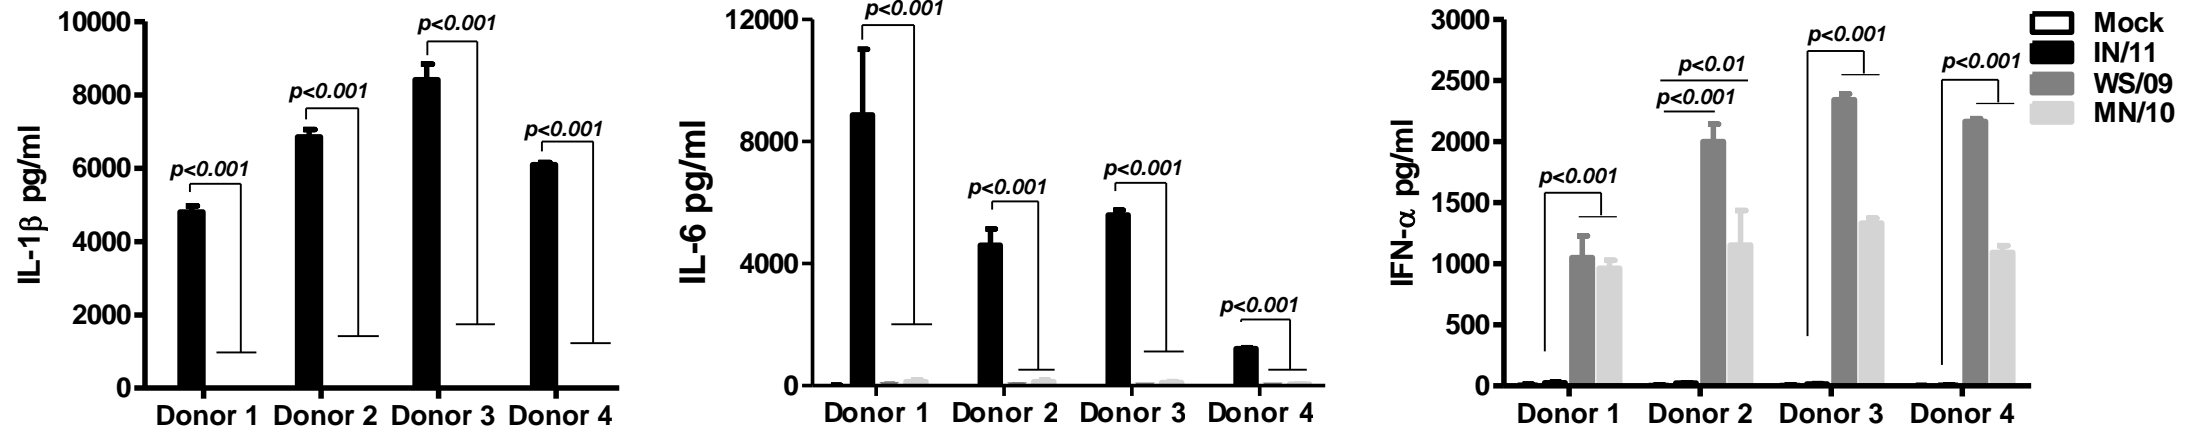

Figure S2

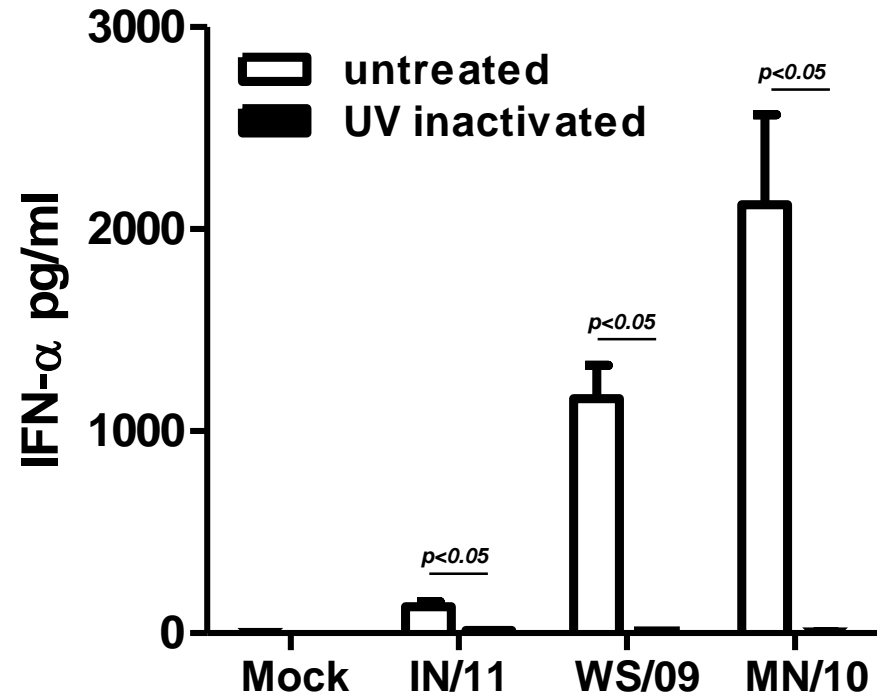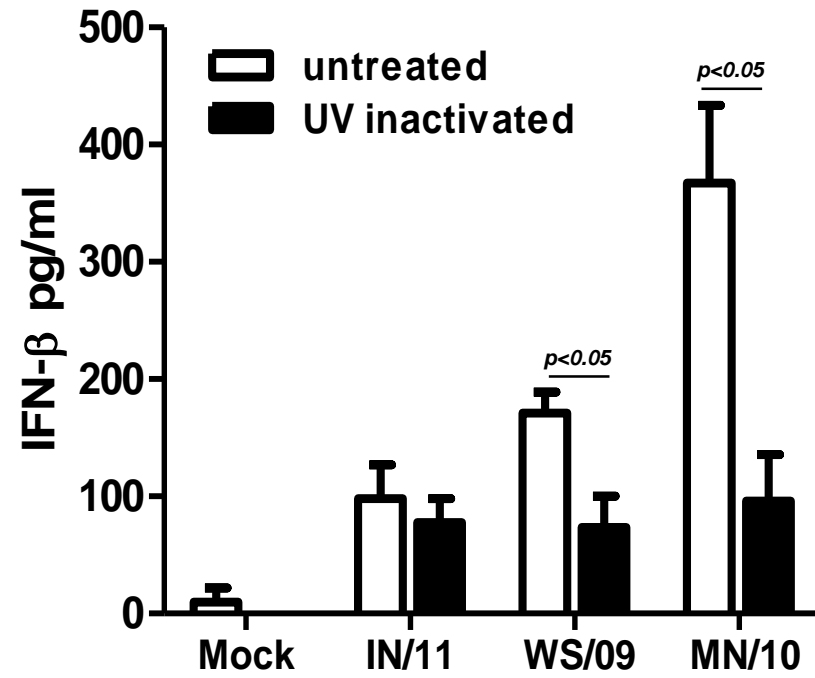

Figure S3

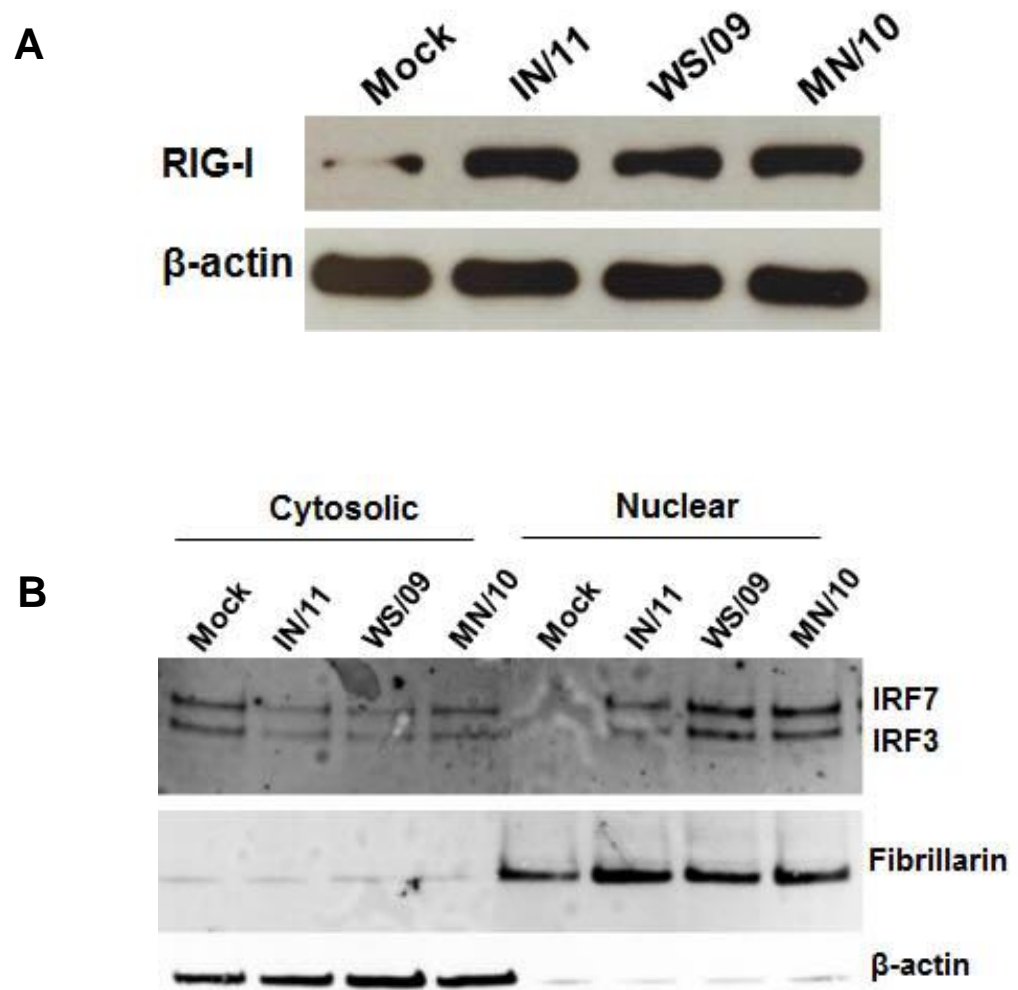

Figure S4

A

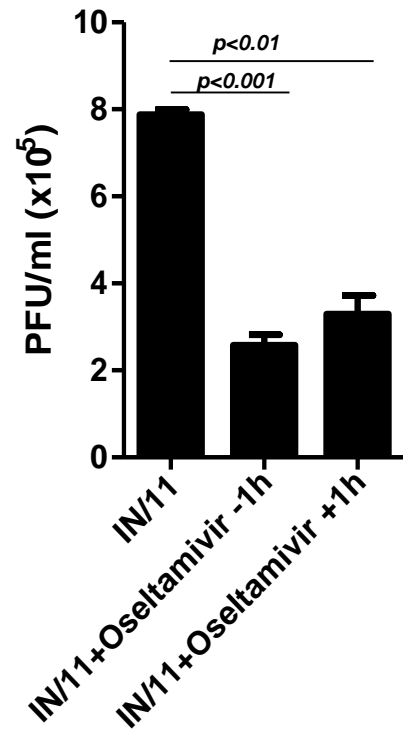

B

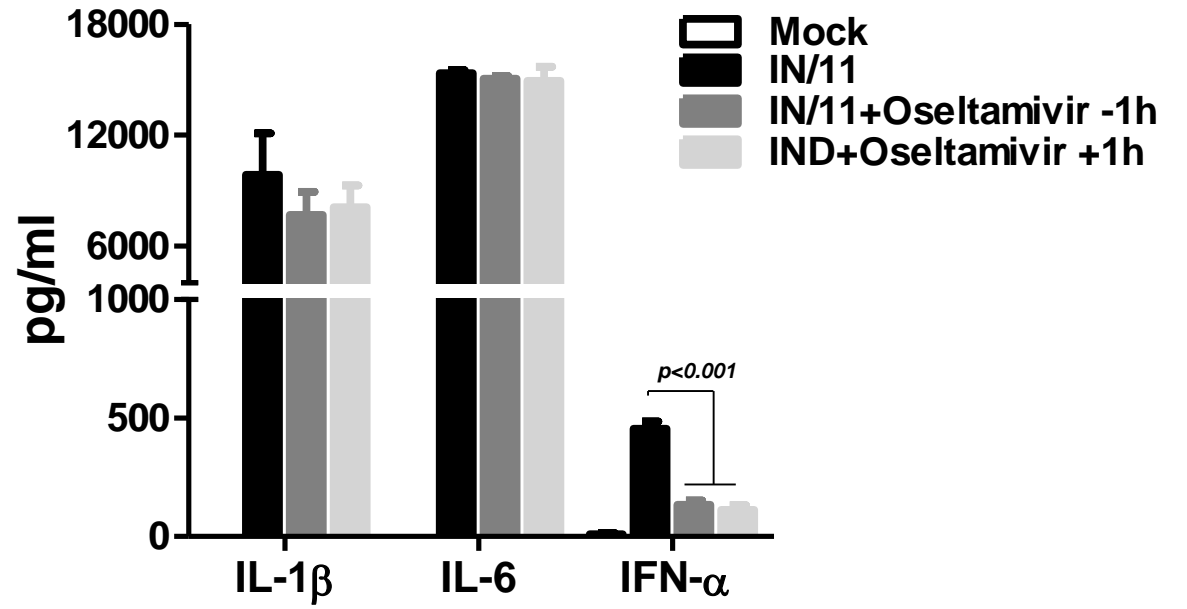

Figure S5

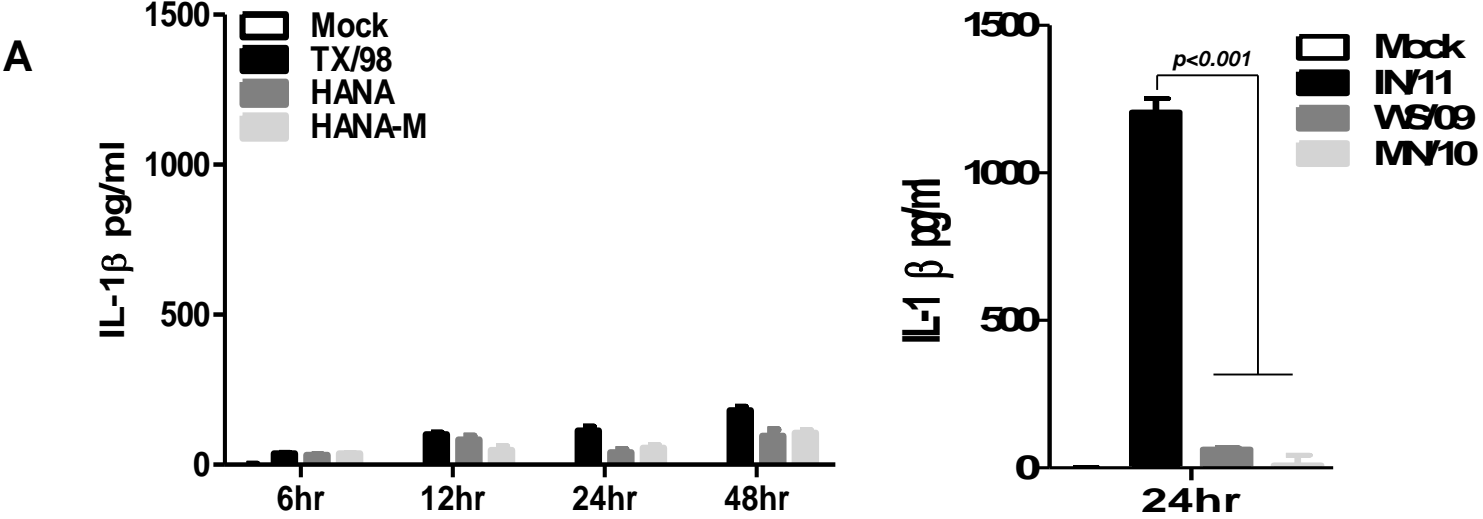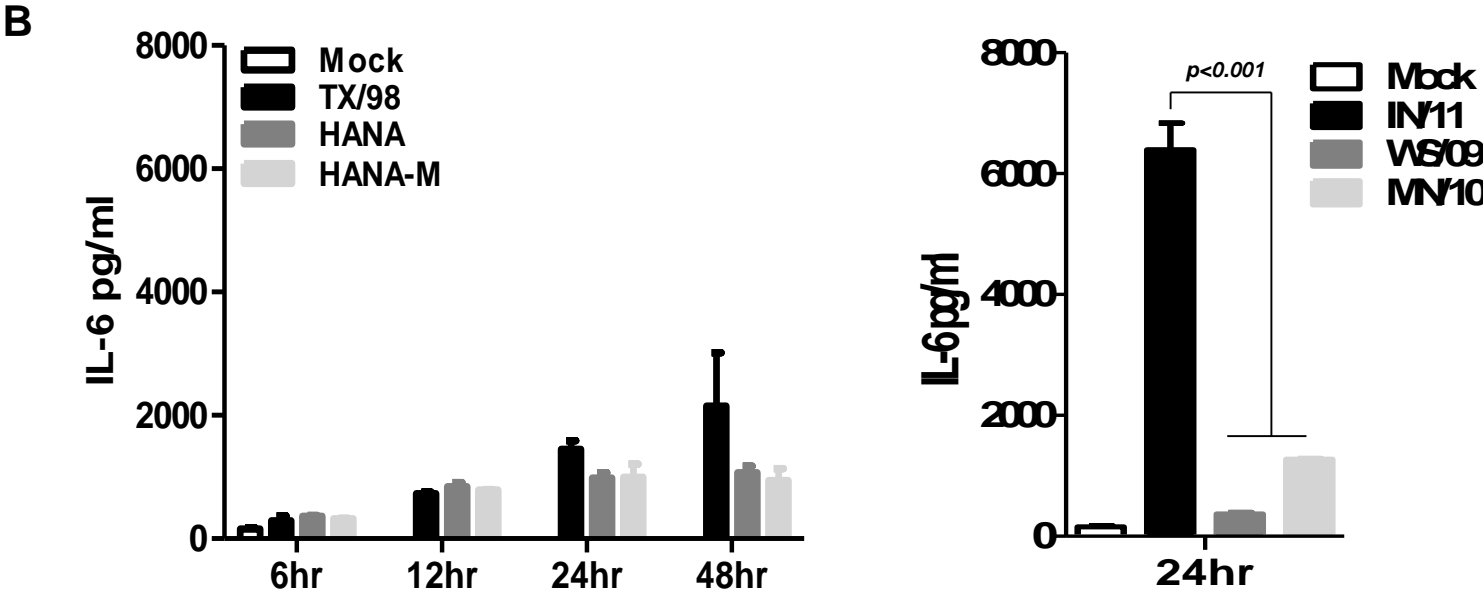

Supplement: NIHMS750995-supplement-Supplementary_figures.pdf [file NIHMS750995-supplement-Supplementary_figures.pdf]
